# Supplementary figures and images for: Diazo transfer at polydopamine – a new way to functionalization
Source: Royal Society of Chemistry journal article supplement (doi:10.1039/c4py00670d), 2014-07-30

## Supporting Information

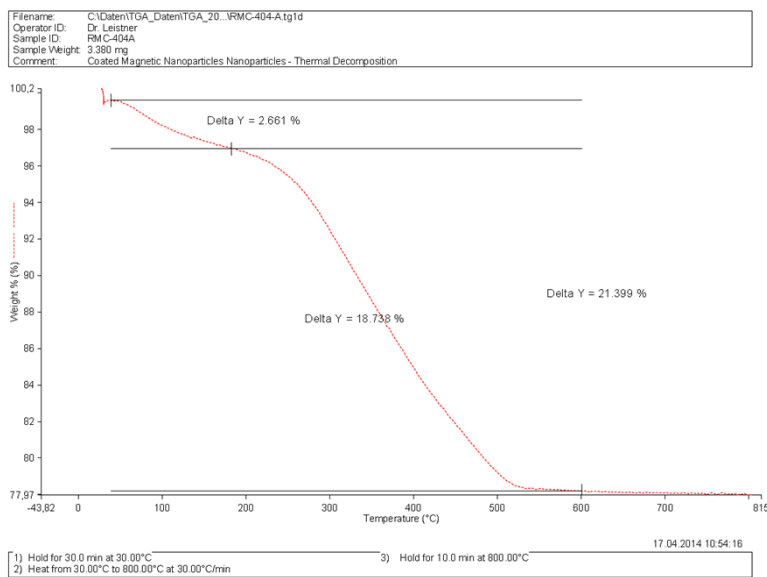

## TGA of MNP 2

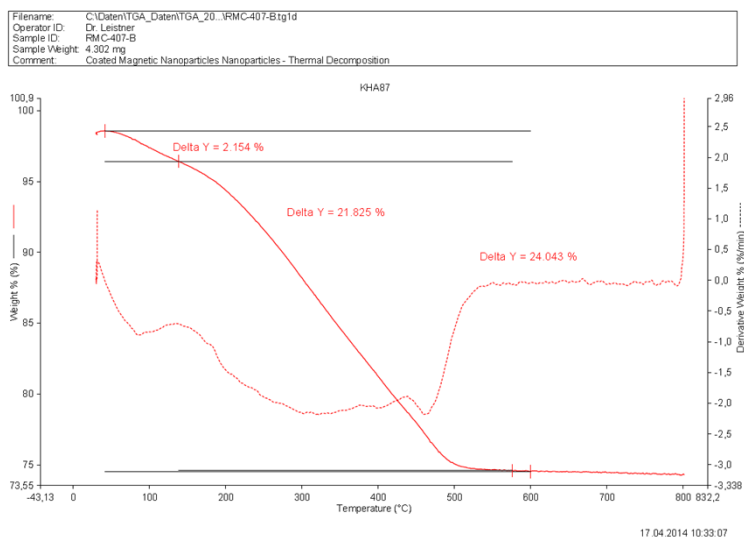

## TGA of MNP 4b

Supplement: c4py00670d1.pdf [file c4py00670d1.pdf]
